# Supplementary material for: Synthesis and characterization of polypyrrole-coated poly(methyl methacrylate) latex particles
Source: Royal Society of Chemistry journal article supplement (doi:10.1039/b816839c), 2009-01-01
Supplement: b816839c.pdf [file b816839c.pdf]

**Supporting Information: J. Ormond-Prout et al., *J. Mater. Chem.* manuscript B816839C**

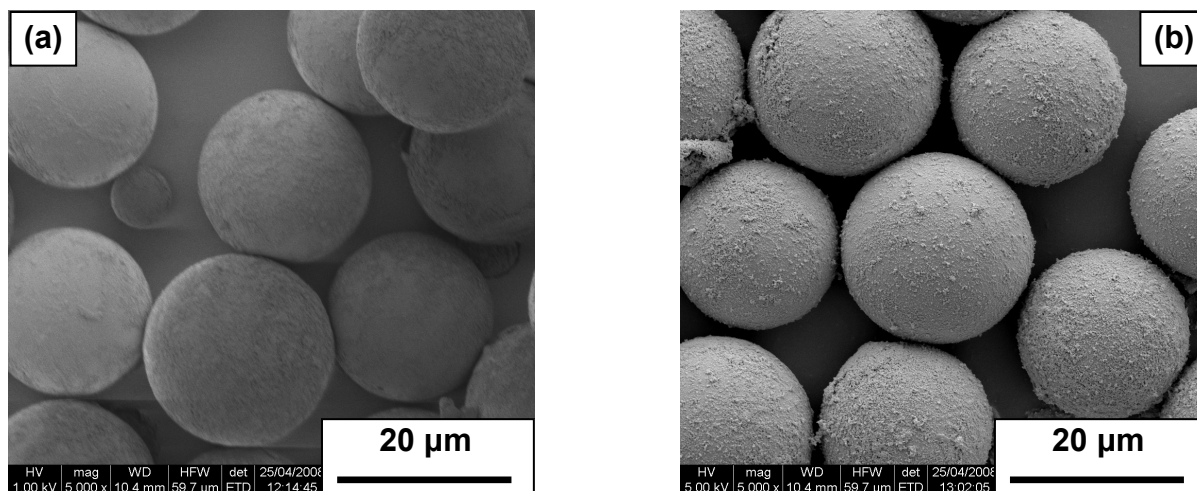

**Figure 1S.** Scanning electron microscopy images obtained for (a) pristine 20  $\mu\text{m}$  PMMA latex and (b) the same latex coated with a 20 nm overlayer of chloride-doped polypyrrole. Note the increased surface roughness due to the presence of the conducting polymer coating.

**Table 1S:** Summary of Raman band positions and peak-widths observed for uncoated poly(methyl methacrylate) [PMMA], polypyrrole chloride bulk powder (PPyCl) and PPyCl-coated PMMA latex.

| Raman peak position and width ( $\text{cm}^{-1}$ ) |           |                   |
|----------------------------------------------------|-----------|-------------------|
| PMMA                                               | PPyCl     | PPyCl-coated PMMA |
| 299, 35 (very weak)                                | -         | -                 |
| 365, 14                                            | -         | 369, 30           |
| 485, 11                                            | -         | 486, 24           |
| 600, 18                                            | -         | 600, 27           |
| 813, 9                                             | -         | 813, 8            |
| -                                                  | 935, 69   | 943, 48           |
| 967, 28                                            | -         | 969, 10           |
| 990, 16                                            | -         | 988, 26           |
| -                                                  | 1050, 30  | 1054, 30          |
| -                                                  | 1083, 38  | 1088, 25          |
| 1122, 21                                           | -         | 1119, 19          |
| 1188, 69 (very weak)                               | -         | -                 |
| -                                                  | 1235, 91  | 1232, 116         |
| -                                                  | 1316, 51  | 1314, 41          |
| -                                                  | 1382, 163 | 1382, 85          |
| 1455, 27                                           | -         | 1453, 25          |
| -                                                  | 1591, 75  | 1595, 74          |
| 1641, 12 (very weak)                               | -         | -                 |
| 1730, 11                                           | -         | 1728, 29          |
| 2843, 18                                           | -         | 2843, 31          |
| 2934, 60                                           | -         | 2933, 71          |
| 2952, 19                                           | -         | 2952, 23          |
| 3007, 46                                           | -         | 3006, 57          |

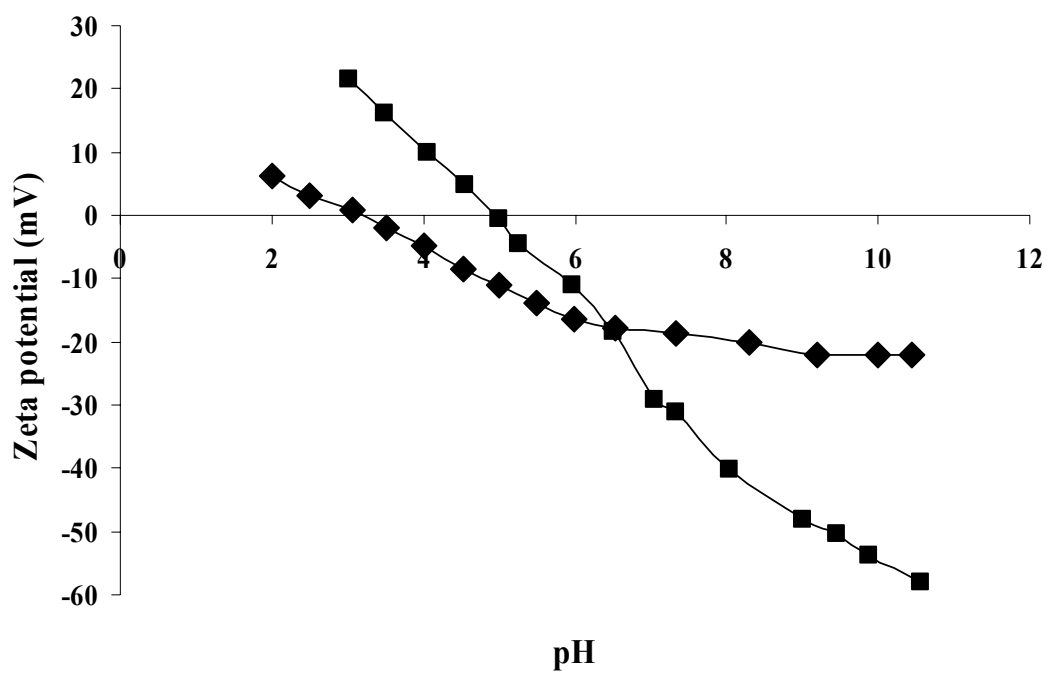

**Figure 2S.** Zeta potential vs. pH curves obtained for 0.01 wt. % aqueous solutions of (◆) uncoated 1.19  $\mu\text{m}$  PMMA latex and (■) PPyCl (17.6 %)-coated 1.19  $\mu\text{m}$  PMMA latex (see entry 8 in Table 1) in the presence of 0.01 M NaCl.
